# Supplementary material
Source: publisher figshare collection journal article supplement (https://acs.figshare.com/ndownloader/files/12544148)
Supplement: Supplementary file 1 [file 12544148]

## Supporting Information

### Non-Target and Suspect Screening of Per- and Polyfluoroalkyl Substances in Airborne Particulate Matter in China

Nanyang Yu<sup>#,†</sup>, Huiwei Guo<sup>#,†</sup>, Ling Jin<sup>‡</sup>, Xuebing Wang<sup>†</sup>, Jingping Yang<sup>§</sup>, Wei Shi<sup>†</sup>,  
Xiaowei Zhang<sup>†</sup>, Hongxia Yu<sup>†</sup>, and Si Wei<sup>†,\*</sup>

<sup>†</sup>State Key Laboratory of Pollution Control and Resource Reuse, School of the  
Environment, Nanjing University, Nanjing, People's Republic of China

<sup>‡</sup>Department of Civil and Environmental Engineering, The Hong Kong Polytechnic  
University, Hung Hom, Kowloon, Hong Kong

<sup>§</sup>Laboratory of Immunology and Reproductive Biology, School of Medicine, Nanjing  
University, Nanjing, People's Republic of China

<sup>#</sup>These authors contributed equally to this work and should be considered co-first  
authors.

\*Phone: +86 25 8968 0356; fax: +86 25 8968 0356; e-mail: weisi@nju.edu.cn (S.W.).

Pages 37

Figures 18

Tables 10

## Contents

|                                                                                                                                                     |                 |
|-----------------------------------------------------------------------------------------------------------------------------------------------------|-----------------|
| <b>Section 1. Standards and reagents.</b>                                                                                                           | <b>Page S3</b>  |
| <b>Section 2. Sample Preparation</b>                                                                                                                | <b>Page S6</b>  |
| <b>Section 3. Instruments Analysis for target PFASs analysis.</b>                                                                                   | <b>Page S8</b>  |
| <b>Section 4. Instruments Analysis for PFASs screening.</b>                                                                                         | <b>Page S12</b> |
| <b>Section 5. PFASs Screening and Identification</b>                                                                                                | <b>Page S14</b> |
| <b>Figure S1. Flowchart of the PFASs homologue analysis.</b>                                                                                        | <b>Page S15</b> |
| <b>Figure S2. The identified PFASs with level 4 or above in APM.</b>                                                                                | <b>Page S16</b> |
| <b>Figure S3. CF<sub>2</sub> normalized adjusted Kendrick mass defect plot of identified PFASs (level 3 or above) by PFASs homologues analysis.</b> | <b>Page S17</b> |
| <b>Figure S4. Identification of PFCAs using PFASs homologues analysis</b>                                                                           | <b>Page S17</b> |
| <b>Figure S5. The MS/MS spectrum for PFPeDA.</b>                                                                                                    | <b>Page S18</b> |
| <b>Figure S6. Identification of PFOS using PFASs homologues analysis</b>                                                                            | <b>Page S18</b> |
| <b>Figure S7. Identification of 1:n PFECAs.</b>                                                                                                     | <b>Page S19</b> |
| <b>Figure S8. The MS/MS spectrum for 8:2 FTA.</b>                                                                                                   | <b>Page S19</b> |
| <b>Figure S9. The MS/MS spectrum for 6:2 FTS.</b>                                                                                                   | <b>Page S20</b> |
| <b>Figure S10. The MS/MS spectrum for PFTrDdiOA in sample (A) and PFDdiOA standard (B).</b>                                                         | <b>Page S21</b> |
| <b>Figure S11. The MS/MS spectrum for H-PFTrDdiA.</b>                                                                                               | <b>Page S21</b> |
| <b>Figure S12. The MS/MS spectrum for UPFDoDA.</b>                                                                                                  | <b>Page S21</b> |
| <b>Figure S13. The MS/MS spectrum for 6:2 diPAP.</b>                                                                                                | <b>Page S22</b> |
| <b>Figure S14. Identification of 6:2 Cl-PFESA.</b>                                                                                                  | <b>Page S22</b> |

|                                                                                                                                                               |                 |
|---------------------------------------------------------------------------------------------------------------------------------------------------------------|-----------------|
| <b>Figure S15. The MS/MS spectrum for OBS in sample (A) and literature (B).</b>                                                                               | <b>Page S23</b> |
| <b>Figure S16. Correlation heatmap and hierarchical clustering of APM samples based on their Pearson correlation coefficients.</b>                            | <b>Page S23</b> |
| <b>Figure S17. The proportional distribution and size distribution of legacy PFASs in indoor APM.</b>                                                         | <b>Page S24</b> |
| <b>Figure S18. Age- and sex-specific health risks posed by PFOA via inhalation in urban China.</b>                                                            | <b>Page S25</b> |
| <b>Table S1: The abbreviations, supplier and purity of PFASs standards and internal standards</b>                                                             | <b>Page S4</b>  |
| <b>Table S2: The percentage of additional PFCA or PFSA homologues in each PFASs standard and the error of the mixture standard for quantitative analysis.</b> | <b>Page S5</b>  |
| <b>Table S3: MS parameter, procedural blank, LOQ, and procedural recovery for target analysis</b>                                                             | <b>Page S10</b> |
| <b>Table S4: sample information including name, location, sampling date and condition.</b>                                                                    | <b>Page S26</b> |
| <b>Table S5: The sensitivity of HPLC-QTOF analysis with known PFASs standards at 0.1, 0.5, 1, and 0.5 µg L<sup>-1</sup>, respectively</b>                     | <b>Page S27</b> |
| <b>Table S6: Parameters used in risk assessment</b>                                                                                                           | <b>Page S28</b> |
| <b>Table S7: The CAS number, IUPAC name and SMILE for the identified PFASs with level 1 and level 2.</b>                                                      | <b>Page S29</b> |
| <b>Table S8: The detection in APM for the identified PFASs with level 4 and level 5.</b>                                                                      | <b>Page S33</b> |
| <b>Table S9: Levels of PFCAs, PFSA and 6:2diPAP (pg m<sup>-3</sup>) measured in outdoor air particle in five cities in China.</b>                             | <b>Page S35</b> |
| <b>Table S10: The identified PFASs in ESI positive mode.</b>                                                                                                  | <b>Page S36</b> |

## Section 1. Standards and reagents.

The detail information on PFASs standards is listed in **Table S1**. Ammonium acetate (HPLC grade) was purchased from CNW technologies GmbH (Duesseldorf, Germany). N-methylpiperidine (HPLC grade, purity: 99%) was purchased from Sigma (USA). Formic acid (HPLC grade, purity: 99%) was purchased from ROE SCIENTIFIC INC (USA). Methanol (HPLC grade, purity: 99.9%) was purchased from Merck (Germany). The additional PFCA or PFSA homologues were checked for all standards, and the errors of quantitation were controlled in 0.6% (**Table S2**). ISO 21675 standard from Wellington Laboratories was used for the identification of PFASs in QTOF data. This standard was prepared for the Interlaboratory trial for validation of ISO 21675 for PFAS in water, which contained 30 native PFAS standards including 13 PFCAs, 5 PFSA, 2 n:2FTSs, 2 PFECAs, FOSA, N-MeFOSA, N-EtFOSA, N-MeFOSAA, N-EtFOSAA, FOEUA, 6:2 Cl-PFESA, 8:2 diPAP.

**Table S1: The abbreviations, supplier and purity of PFASs standards and internal standards**

|                    | Compound name                                             | Abbreviation | Supplier                | Purity |
|--------------------|-----------------------------------------------------------|--------------|-------------------------|--------|
| Analyte            | Perfluoropentanoate                                       | PFPeA        | Sigma-Aldrich           | 97%    |
|                    | Perfluorohexanoate                                        | PFHxA        | Sigma-Aldrich           | 97%    |
|                    | Perfluoroheptanoate                                       | PFHpA        | Sigma-Aldrich           | 99%    |
|                    | Perfluorooctanoate                                        | PFOA         | Alfa Aesar              | 95%    |
|                    | Perfluorononanoate                                        | PFNA         | Alfa Aesar              | 97%    |
|                    | Perfluorodecanoate                                        | PFDA         | Sigma-Aldrich           | 98%    |
|                    | Perfluoroundecanoate                                      | PFUnDA       | Sigma-Aldrich           | 95%    |
|                    | Perfluorododecanoate                                      | PFDoDA       | Sigma-Aldrich           | 95%    |
|                    | Perfluorotridecanoate                                     | PFTTrDA      | Sigma-Aldrich           | 97%    |
|                    | Perfluorotetradecanoate                                   | PFTeDA       | Sigma-Aldrich           | 97%    |
|                    | Perfluorobutane sulfonate                                 | PFBS         | Woke                    | 98%    |
|                    | Perfluorohexane sulfonate                                 | PFHxS        | Sigma-Aldrich           | 98%    |
|                    | n-perfluoro-1-octanesulfonate                             | PFOS         | Wellington Laboratories | 98%    |
|                    | Sodium bis(1H,1H,2H,2H-perfluorooctyl)phosphate           | 6:2diPAP     | Wellington Laboratories | 98%    |
| Internal Standards | Perfluoro-n-[1,2-13C2]hexanoic acid                       | MPFHxA       | Wellington Laboratories | 98%    |
|                    | Perfluoro-n-[1,2,3,4-13C4]octanoic acid                   | MPFOA        | Wellington Laboratories | 99%    |
|                    | Perfluoro-n-[1,2,3,4,5-13C5]nonanoic acid                 | MPFNA        | Wellington Laboratories | 98%    |
|                    | Perfluoro-n-[1,2-13C2]decanoic acid                       | MPFDA        | Wellington Laboratories | 98%    |
|                    | Perfluoro-n-[1,2-13C2]undecanoic acid                     | MPFUnDA      | Wellington Laboratories | 98%    |
|                    | Perfluoro-n-[1,2,3,4-13C4]dodecanoic acid                 | MPFDoDA      | Wellington Laboratories | 98%    |
|                    | Sodium perfluoro-1-hexane[18O2]sulfonate                  | MPFHxS       | Wellington Laboratories | 98%    |
|                    | Sodium perfluoro-1-[1,2,3,4-13C4]octanesulfonate          | MPFOS        | Wellington Laboratories | 99%    |
|                    | Sodium bis(1H,1H,2H,2H-[1,2-13C2]perfluorodecyl)phosphate | M8:2diPAP    | Wellington Laboratories | 99%    |

**Table S2. The percentage of additional PFCA or PFSA homologues in each PFASs standard and the error of the mixture standard for quantitative analysis.**

| PFASs<br>standard | PFBS  | PFHxS | PFOS  | PFPeA | PFHxA | PFHpA | PFOA  | PFNA  | PFDA  | PFUnDA | PFDoDA | PFTTrDA | PFTeDA |
|-------------------|-------|-------|-------|-------|-------|-------|-------|-------|-------|--------|--------|---------|--------|
| PFBS              | /     | -     | -     | -     | -     | -     | -     | -     | -     | -      | -      | -       | -      |
| PFHxS             | 0.42% | /     | -     | -     | -     | -     | -     | -     | -     | -      | -      | -       | -      |
| PFOS              | -     | -     | /     | -     | -     | -     | -     | -     | -     | -      | -      | -       | -      |
| PFPeA             | -     | -     | -     | /     | -     | 0.26% | -     | -     | -     | -      | -      | -       | -      |
| PFHxA             | 0.20% | 0.22% | -     | -     | /     | -     | -     | -     | -     | -      | -      | -       | -      |
| PFHpA             | -     | -     | -     | -     | -     | /     | -     | -     | -     | -      | -      | -       | -      |
| PFOA              | -     | -     | -     | -     | 0.52% | -     | /     | -     | -     | -      | -      | -       | -      |
| PFNA              | -     | -     | -     | -     | -     | 0.25% | -     | /     | -     | -      | -      | -       | -      |
| PFDA              | -     | -     | -     | -     | -     | -     | -     | -     | /     | -      | -      | -       | -      |
| PFUnDA            | -     | -     | -     | -     | -     | -     | -     | -     | -     | /      | -      | -       | -      |
| PFDoDA            | -     | -     | -     | -     | -     | -     | 0.21% | 0.22% | -     | -      | /      | -       | -      |
| PFTTrDA           | -     | -     | -     | -     | -     | -     | -     | -     | -     | -      | -      | /       | 0.29%  |
| PFTeDA            | -     | -     | -     | -     | -     | -     | -     | -     | -     | -      | -      | -       | /      |
| Mix standard      | 0.62% | 0.22% | 0.00% | 0.00% | 0.52% | 0.51% | 0.21% | 0.22% | 0.00% | 0.00%  | 0.00%  | 0.00%   | 0.29%  |

## **Section 2. Sample Preparation.**

Sample preparation was modified based on previous study<sup>1</sup>. Each particle-size fraction of both samplers was extracted separately. For extraction, samples were placed into 15mL polypropylene centrifuge tubes and spiked with mass-labelled PFASs including MPFHxA, MPFOA, MPFNA, MPFDA, MPFUnA, MPFDoA, MPFHxS, MPFOS and M8:2diPAP. Each internal standard was 0.5 ng except for M8:2diPAP which was 1 ng. Extraction was performed four cycles by 40°C ultrasonic bath, and during each cycle it took 10 min and 5 mL, 5 mL, 5 mL and 3 mL of methanol, respectively. After each extraction step, samples were centrifuged for 5 min at 5000 rpm. Supernatants of each sample were combined in a separate polypropylene centrifuge tube and was reduced to a volume of 1 mL by evaporation under a gentle stream of nitrogen. Then the concentrated extracts were further cleaned up with a Supelclean ENVI-carb cartridge (Supelco, Bellfonte, USA). The cartridge was pre-cleaned with 3 mL of methanol, the extract was added and eluted with 3 mL of methanol. The 4 mL of extract and eluate were collected and then concentrated again to 0.5 mL under a gentle stream of nitrogen. The final concentrated extract was passed through a polypropylene-membrane syringe filter (Acrodisc GHP, 13 mm, 0.2 µm, Waters).

For non-target analysis, 100 µL filtrate of each fraction was combined and re-concentrated into 100 µL. While, for target analysis each fraction was analysed separately. A volume of 100 µL of filtrate and 100 µL of 2mM ammonium acetate was transferred into a polypropylene vial for PFCAs and PFSA's analysis. A volume of 170 µL of filtrate and 30 µL of diluent-A (a mixture of formic acid, N-methylpiperidine and

Milli-Q water, the value of  $V_{\text{formic acid}}: V_{\text{N-methylpiperidine}}: V_{\text{Milli-Q water}}$  was 7:20:200) was transferred into a polypropylene vial for diPAPs analysis.



### **Section 3. Instruments Analysis for target PFASs analysis.**

**Instrumental analysis for PFCAs and PFSA.** PFCAs and PFSA were determined by high performance liquid chromatography (HPLC; Agilent Technologies, Waldbronn, Germany) – tandem mass spectrometry with an electrospray ionization (ESI) source (API-4000, ABSciex, Darmstadt, Germany). A PFAS isolator was set to reduce the instrument background. A BEH C18 column (2.1 mm×50 mm, 2.5 µm, Waters, U.S.) held at 40 °C was used to separate target analyte. The mobile phases used were 2mM ammonium acetate in water (A) and methanol (B). The gradient was set as follows: 10 µL aliquot of sample was injected into HPLC-MS/MS and the flow rate was set 400 µL/min with starting at 95% of solvent A held until 0.50 min, then decreased to 80% of solvent A until 1.5 min, then decreased to 50% of solvent A until 5 min, then decreased to 35% of solvent A until 13 min, then decreased to 15% of solvent A until 14.5 min, then decreased to 0% of solvent A until 15.5 min, then increased to 95% of solvent A until 15.6 min, then kept 95% of solvent A until 18 min for equilibration.

The mass spectrometer was operated in the negative ion mode with multiple reaction monitoring (MRM). The source temperature was set at 400 °C, and the IonSpray Voltage was set to -4500 V. The curtain gas, nebulizer gas and drying gas pressures were 15, 55 and 55 psi, respectively. For each compound except for PFPeA, two MRM-transitions were monitored. Other parameters such as precursor/product ions, declustering potential (DP) and collision energy (CE) were shown in **Table S3**.

**Instrumental analysis for diPAPs.** Instruments used in diPAPs analysis were same as PFCAs and PFSA. The mobile phases used were 5mM N-methylpiperdine in water (A)

and methanol (B). The gradient was set as follows: 5  $\mu$ L aliquot of sample was injected into HPLC-MS/MS and the flow rate was set 400  $\mu$ L/min with starting at 95% of solvent A held until 0.50 min, then decreased to 70% of solvent A until 1 min, then decreased to 15% of solvent A until 6 min, then decreased to 0% of solvent A until 8.5 min, then kept 0% of solvent A until 9.5 min, then increased to 95% of solvent A until 9.6 min, then kept 95% of solvent A until 19min for equilibration.

The mass spectrometry was operated in the negative ion mode with MRM. The source temperature was set at 600  $^{\circ}$ C, and the ionspray voltage was set to -4500 V. The curtain gas, nebulizer gas and drying gas pressures were 15, 55 and 55 psig, respectively. Other details were seen in **Table S3**.

**Table S3: MS parameter, procedural blank, LOQ, and procedural recovery for target analysis**

| analyte       | declustering potential (V) | Collision Energy (V) | Precursor ion | Product ion | Internal Standard | Procedural blank (n=6) | LOQ <sup>a</sup> | Procedural recovery(n=4) |      |
|---------------|----------------------------|----------------------|---------------|-------------|-------------------|------------------------|------------------|--------------------------|------|
|               |                            |                      |               |             |                   |                        |                  | Mean                     | SD   |
| <b>PFBS</b>   | -78                        | -57                  | 298.8         | 79.9        | <b>MPFHxS</b>     | ND <sup>a</sup>        | 0.05             | 95.0%                    | 0.10 |
|               | -82                        | -43                  |               | 98.9        |                   |                        |                  |                          |      |
| <b>PFHxS</b>  | -98                        | -79                  | 399.0         | 80.1        | <b>MPFHxS</b>     | ND                     | 0.05             | 90.2%                    | 0.08 |
|               | -98                        | -56                  |               | 98.9        |                   |                        |                  |                          |      |
| <b>PFOS</b>   | -105                       | -95                  | 498.7         | 80.0        | <b>MPFOS</b>      | ND                     | 0.05             | 96.6%                    | 0.21 |
|               | -105                       | -75                  |               | 98.9        |                   |                        |                  |                          |      |
| <b>PFPeA</b>  | -36                        | -12                  | 262.8         | 218.5       | <b>MPFHxA</b>     | ND                     | 0.05             | 90.0%                    | 0.12 |
| <b>PFHxA</b>  | -45                        | -13                  | 323.2         | 268.7       | <b>MPFHxA</b>     | ND-<1/2LOQ             | 0.13             | 103%                     | 0.06 |
|               | -42                        | -30                  |               | 119.0       |                   |                        |                  |                          |      |
| <b>PFHpA</b>  | -35                        | -14                  | 362.9         | 318.8       | <b>MPFOA</b>      | ND-<1/2LOQ             | 0.05             | 85.2%                    | 0.08 |
|               | -40                        | -26                  |               | 168.9       |                   |                        |                  |                          |      |
| <b>PFOA</b>   | -43                        | -15                  | 413.1         | 368.8       | <b>MPFOA</b>      | ND-<1/2LOQ             | 0.05             | 88.9%                    | 0.12 |
|               | -43                        | -27                  |               | 168.9       |                   |                        |                  |                          |      |
| <b>PFNA</b>   | -39                        | -16                  | 436.0         | 418.8       | <b>MPFNA</b>      | ND-<1/2LOQ             | 0.09             | 83.3%                    | 0.12 |
|               | -47                        | -25                  |               | 18.8        |                   |                        |                  |                          |      |
| <b>PFDA</b>   | -25                        | -17                  | 512.8         | 468.8       | <b>MPFDA</b>      | ND-<1/2LOQ             | 0.05             | 81.0%                    | 0.11 |
|               | -60                        | -25                  |               | 218.8       |                   |                        |                  |                          |      |
| <b>PFUnA</b>  | -50                        | -17                  | 563.0         | 518.9       | <b>MPFUnA</b>     | ND-<1/2LOQ             | 0.05             | 84.0%                    | 0.12 |
|               | -49                        | -26                  |               | 269.2       |                   |                        |                  |                          |      |
| <b>PFDoDA</b> | -48                        | -17                  | 613.0         | 568.8       | <b>MPFDoDA</b>    | ND                     | 0.05             | 95.1%                    | 0.20 |
|               | -54                        | -29                  |               | 268.8       |                   |                        |                  |                          |      |

| analyte                     | declustering<br>potential (V) | Collision<br>Energy (V) | Precursor<br>ion | Product<br>ion | Internal<br>Standard | Procedural<br>blank (n=6) | LOQ <sup>a</sup> | Procedural recovery(n=4) |      |
|-----------------------------|-------------------------------|-------------------------|------------------|----------------|----------------------|---------------------------|------------------|--------------------------|------|
|                             |                               |                         |                  |                |                      |                           |                  | Mean                     | SD   |
| <b>PFTTrA</b>               | -57                           | -19                     | 662.9            | 618.9          | <b>MPFDoDA</b>       | ND                        | 0.05             | 74.9%                    | 0.09 |
|                             | -58                           | -31                     |                  | 318.8          |                      |                           |                  |                          |      |
| <b>PFTeA</b>                | -59                           | -21                     | 712.9            | 668.9          | <b>MPFDoDA</b>       | ND                        | 0.05             | 80.1%                    | 0.08 |
|                             | -65                           | -42                     |                  | 168.9          |                      |                           |                  |                          |      |
| <b>6:2diPAP<sup>b</sup></b> | -85                           | -28                     | 788.9            | 442.9          | <b>M8:2diPAP</b>     | ND                        | 0.1              | 90.6%                    | 0.11 |
|                             | -85                           | -70                     |                  | 97.0           |                      |                           |                  |                          |      |

a: dimensions for procedural blank and LOQ were both µg/L and they represent the levels of procedural blank and LOQ detected in the instrument.

b: the number of procedure blank and procedure recovery were both three.

#### **Section 4. Instruments Analysis for PFASs screening.**

PFASs screening was performed on high performance liquid chromatography (HPLC; Agilent Technologies, Waldbronn, Germany) coupled with a high resolution hybrid quadrupole time-of-flight mass spectrometer (Triple TOF 5600, AB Sciex, Foster City, CA) with an electrospray ionization (ESI) source operating in a negative ion mode. A BEH C18 column (2.1 mm×50 mm, 2.5  $\mu$ m, Waters, U.S.) held at 40 °C was used to separate chemicals. The mobile phases used were 2mM ammonium acetate in 5% methanol aqueous solution (A) and methanol (B). The gradient was set as follows: 5  $\mu$ L aliquot of sample was injected into LC-Q-TOF-MS and the flow rate was set 400  $\mu$ L/min with starting at 100% of solvent A and was kept for 1 min, then decreased to 75% of solvent A until 9 min, then decreased to 50% of solvent A until 18 min, then decreased to 25% until 28 min, then decreased to 0% until 39min and kept for 9 min, then increased to 100% of solvent A until 48.1 min, then kept 100% of solvent A until 55 min for equilibration. The information dependent acquisition (IDA) experiment was conducted with a TOF MS full scan analysis (100ms) and up to 20 dependent MS/MS analysis (50ms for each MS/MS analysis) per cycle. The TOF MS full scan was operated with the mass range of  $m/z$  50 to 1250, and the dependent MS/MS was operated with the mass range of  $m/z$  30 to 1250 under the high-resolution mode. The mass resolution of information-dependent acquisition (including MS and MS/MS scan) is 25,000 FWHM (full width at half maxima) for  $m/z$  100 and 40,000 FWHM for  $m/z$  950. Dynamic Background Subtraction, which enables detection of species as their signal increases in intensity, therefore focusing on detection and analysis of the

precursor ions on the rising portion of the LC peak, up to the top of the LC peaks (maximum intensity), was applied in the IDA criteria for dynamic exclusion. The fragment ions were generated from collision induced dissociation with nitrogen under a standardized collision energy (CE) = -50 V with collision energy spread (CES) =  $\pm 10$  V. The other experimental parameters were: nebulizer gas (gas 1), 45 psi; heater gas (gas 2), 45 psi; curtain gas, 25 psi; temperature, 550 °C; ionspray voltage floating, -4500 V; declustering potential, -100 V; collision energy, -10 V. All gases used were nitrogen.

## Section 5. PFASs Screening and Identification.

All indoor (or outdoor) data were opened with PeakView 1.2 and a procedure blank was set as control. “Enhance peak find” was used to build non-target analysis list with background subtraction. An initial picking based on a:  $S/N > 3$ ; b: intensity  $> 100$ ; was conducted. The peaks with  $CF_2$  normalized mass defects for PFASs ( $> 0.85$  or  $< 0.15$ ) were further identified the homologous series of PFASs. The PFASs homologues were identified by the mass difference of 49.99681 Da ( $-[CF_2]-$ ) and 99.99362 Da ( $-[CF_2CF_2]-$ ) among the exact mass of peaks. The mass difference of PFASs homologues was conducted by a matlab script written by authors. In this script, the peak list including exact mass and retention time was the input data, and the homologue candidate list was the output result. During the running of script, the mass difference of any two peaks was calculated. If the mass difference was equal to  $(CF_2)_n$  or  $(CF_2CF_2)_n$  (mass error  $< 5$  ppm), the two peaks was retained in the homologue candidate list (Figure S1). The extract ion chromatograms (EICs) and retention times (RT) of each series were checked respectively. In each series, an ascending trend of  $m/z$  vs. retention time (RT) should be observed. To exclude dimers, adducts, and isotopes in the identified PFASs homologues, the exact mass of peaks (mass error  $< 5$  ppm) with the same retention time ( $< 0.1$  min) were checked.  $[M+Na-2H]-$ ,  $[M+K-2H]-$ ,  $[M+NH_4-2H]-$ ,  $[M+Ac]-$ ,  $[M+NaAc-H]-$ ,  $[2M-H]-$ ,  $[2M+Na-2H]$ ,  $[2M+K-2H]$ , and  $[2M+NH_4-2H]$  were considered as potential dimers or adducts. Homologues series (over 3 congeners) meeting all those rules were further carried out for molecular formulae calculation and structure speculation.

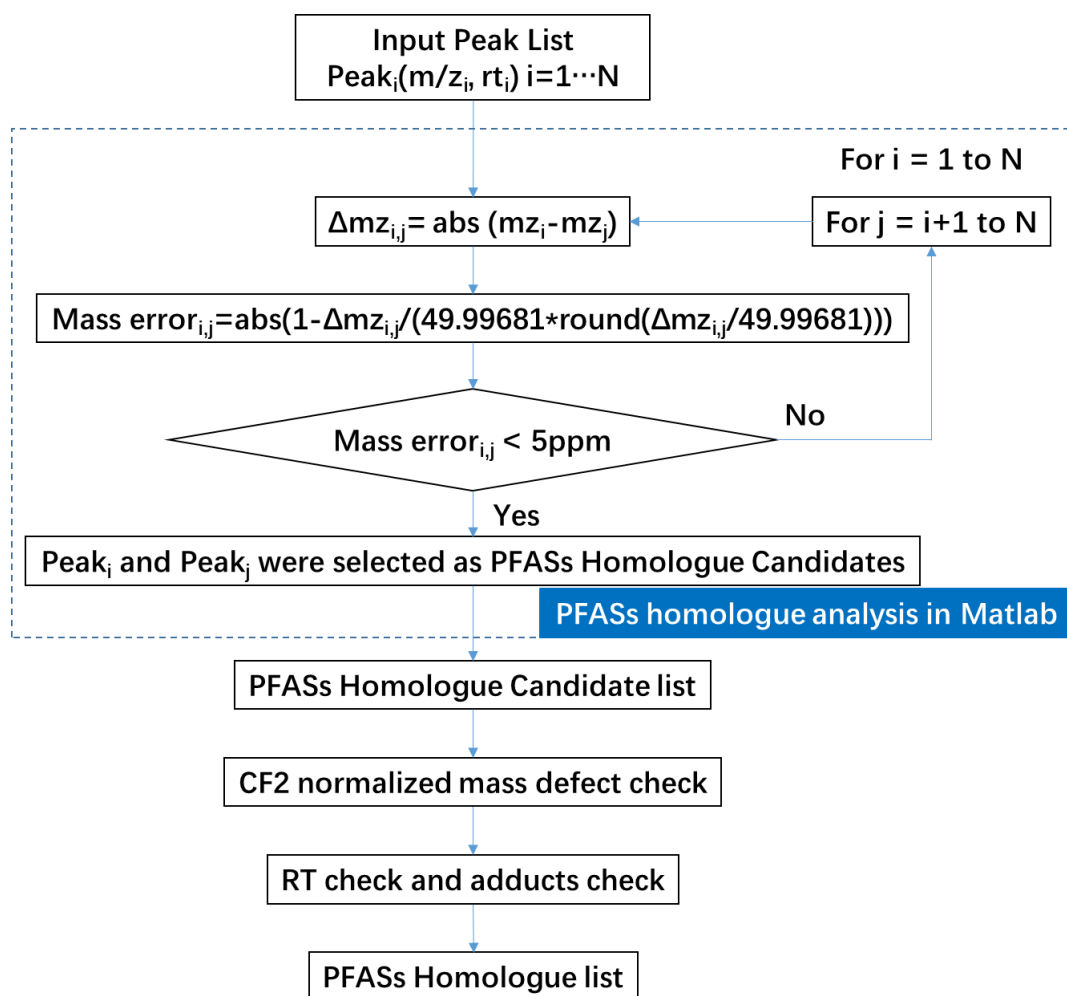

**Figure S1. Flowchart of the PFASs homologue analysis.**

Molecular formulae were calculated using a calculator in PeakView<sup>®</sup> 1.2 based on accurate mass, isotope distributions, and fragments in MS/MS spectrum (exact mass error < 5 ppm, isotope ratio difference <20%, and fragments mass error < 5 mDa). Parameter settings were based on published methods with some modification.<sup>2,3</sup> The elements setting included C (3-50), H (0-50), F (0-50), O (0-8), P (0-4), S (0-4), Cl (0-2). The number of ring and double bond ranged from 0 to 5. Even-electron state and charge state of -1 ([M-H]<sup>-</sup>) were selected for the calculation of molecular formulae.



| Homologue            | Proposed Structure   | Formula     | level      | Observe m/z | error ppm | RT min | RT delta min | Homologue              | Proposed Structure        | Formula      | level       | Observe m/z | error ppm | RT min | RT delta min |       |
|----------------------|----------------------|-------------|------------|-------------|-----------|--------|--------------|------------------------|---------------------------|--------------|-------------|-------------|-----------|--------|--------------|-------|
| PFSA <sub>s</sub>    | SA(4)                | C4F9SO3H    | 1          | 298.9421    | -2.9      | 13.0   | 0.032        | H-PFdiOAs              | D(11)                     | C14H3F23O4   | 3           | 670.9586    | -0.8      | 20.8   |              |       |
|                      | SA(6)                | C6F13SO3H   | 1          | 398.9356    | -2.6      | 20.6   | -0.034       |                        | D(12)                     | C15H3F25O4   | 4           | 720.9546    | -1.8      | 22.5   |              |       |
|                      | SA(7)                | C7F15SO3H   | 4          | 448.9331    | -0.9      | 22.9   |              |                        | n:2 Cl-PFESA <sub>s</sub> | E(6)         | C8HCiF16O4S | 1           | 530.8932  | -4.4   | 25.8         | 0.037 |
|                      | SA(8)                | C8F17SO3H   | 1          | 498.9289    | -2.7      | 24.9   | -0.046       |                        | E(8)                      | C10HCiF20O4S | 2           | 630.8866    | -4.1      | 28.8   |              |       |
| PFCA <sub>s</sub>    | SB(5)                | C6F11O2H    | 1          | 312.9718    | -3.2      | 15.7   | -0.030       | PFdiOAs                | F(7)                      | C9F14O4H2    | 2           | 438.9667    | 2.3       | 8.1    |              |       |
|                      | SB(6)                | C7F13O2H    | 1          | 362.9681    | -4.1      | 19.8   | -0.007       |                        | F(8)                      | C10F16O4H2   | 1           | 488.9610    | -3.1      | 12.5   | 0.044        |       |
|                      | SB(7)                | C8F15O2H    | 1          | 412.9647    | -4.1      | 22.4   | -0.054       |                        | F(9)                      | C11F18O4H2   | 2           | 538.9588    | -0.9      | 15.6   |              |       |
|                      | SB(8)                | C9F17O2H    | 1          | 462.9615    | -3.8      | 24.6   | -0.052       |                        | F(10)                     | C12F20O4H2   | 1           | 588.9554    | -1.2      | 18.1   | 0.024        |       |
|                      | SB(9)                | C10F19O2H   | 1          | 512.9597    | -0.7      | 26.4   | -0.018       | F(11)                  | C13F22O4H2                | 2            | 638.9523    | -0.9        | 20.2      |        |              |       |
|                      | SB(10)               | C11F21O2H   | 1          | 562.9548    | -3.6      | 27.8   | -0.102       | F(12)                  | C14F24O4H2                | 2            | 688.9494    | -0.4        | 21.9      |        |              |       |
|                      | SB(11)               | C12F23O2H   | 1          | 612.9525    | -1.8      | 29.2   | 0.017        | F(13)                  | C15F26O4H2                | 2            | 738.9455    | -1.3        | 23.5      |        |              |       |
|                      | SB(12)               | C13F25O2H   | 1          | 662.9477    | -4.2      | 30.4   | 0.019        | F(14)                  | C16F28O4H2                | 4            | 788.9451    | 2.3         | 24.9      |        |              |       |
|                      | SB(13)               | C14F27O2H   | 1          | 712.9455    | -2.4      | 31.4   | 0.004        | F(15)                  | C17F30O4H2                | 4            | 838.9427    | 3.1         | 26.2      |        |              |       |
|                      | SB(14)               | C15F29O2H   | 2          | 762.9434    | -0.9      | 32.3   |              | UPFA <sub>s</sub>      | G(4)                      | C7F13OH      | 3           | 346.9732    | -4.4      | 22.5   |              |       |
|                      | SB(15)               | C16F31O2H   | 1          | 812.9405    | -0.5      | 33.0   | 0.006        |                        | G(5)                      | C8F15OH      | 3           | 396.9709    | -1.7      | 24.6   |              |       |
|                      | SB(16)               | C17F33O2H   | 2          | 862.9365    | -1.4      | 33.9   |              |                        | G(6)                      | C9F17OH      | 4           | 446.9663    | -4.4      | 26.4   |              |       |
| 1:n PFECAs           | SB(17)               | C18F35O2H   | 1          | 912.9323    | -2.4      | 34.2   | 0.004        |                        | G(7)                      | C10F19OH     | 4           | 496.9664    | 2.6       | 27.8   |              |       |
|                      | A(8)                 | C10F19O3H   | 2          | 528.9528    | -4.1      | 26.7   |              |                        | G(8)                      | C11F21OH     | 3           | 546.9615    | -0.9      | 29.2   |              |       |
|                      | A(9)                 | C11F21O3H   | 2          | 578.9542    | 4.2       | 28.2   |              |                        | G(9)                      | C12F23OH     | 3           | 596.9597    | 1.5       | 30.4   |              |       |
|                      | A(10)                | C12F23O3H   | 2          | 628.9487    | 0.3       | 29.4   |              |                        | G(10)                     | C13F25OH     | 3           | 646.9539    | -2.5      | 31.3   |              |       |
|                      | A(11)                | C13F25O3H   | 2          | 678.9451    | -0.4      | 30.5   |              |                        | G(11)                     | C14F27OH     | 3           | 696.9513    | -1.5      | 32.3   |              |       |
|                      | A(12)                | C14F27O3H   | 2          | 728.9449    | 3.8       | 31.5   |              |                        | G(12)                     | C15F29OH     | 3           | 746.9494    | 0.4       | 33.1   |              |       |
|                      | A(13)                | C15F29O3H   | 2          | 778.9392    | 0.2       | 32.4   |              |                        | G(13)                     | C16F31OH     | 3           | 796.9478    | 2.3       | 33.8   |              |       |
|                      | A(14)                | C16F31O3H   | 4          | 828.9354    | -0.5      | 33.1   |              | OBS                    | H                         | C15H5F17SO4  | 2           | 602.9536    | -4.7      | 26.8   |              |       |
|                      | A(15)                | C17F33O3H   | 4          | 878.9318    | -0.9      | 33.8   |              |                        | I                         | C16H9F26O4P  | 1           | 788.9724    | -3.4      | 31.3   | 0.014        |       |
|                      | n:2 FTA <sub>s</sub> | B(8)        | C10F17O2H3 | 2           | 476.9777  | -2.4   | 21.9         |                        | UPFCA <sub>s</sub> *      | -            | C9F15O2H    | 4           | 424.9645  | -4.5   | 21.7         |       |
| B(9)                 |                      | C11F19O2H3  | 2          | 526.9746    | -2.1      | 23.8   |              | -                      |                           | C10F17O2H    | 4           | 474.9622    | -2.2      | 23.9   |              |       |
| B(10)                |                      | C12F21O2H3  | 2          | 576.9727    | 0.4       | 25.6   |              | -                      |                           | C11F19O2H    | 4           | 524.9584    | -3.1      | 25.7   |              |       |
| n:2 FTS <sub>s</sub> | C(6)                 | C8F13SO3H5  | 1          | 426.9667    | -2.8      | 22.2   | -0.042       | Cl-PFCA <sub>s</sub> * | -                         | C8F14ClO2H   | 4           | 428.9355    | -3.3      | 22.7   |              |       |
|                      | C(8)                 | C10F17SO3H5 | 1          | 526.9594    | -4.1      | 26.3   | -0.026       |                        | -                         | C9F16ClO2H   | 4           | 478.9345    | 1.7       | 24.9   |              |       |
|                      | C(10)                | C12F21SO3H5 | 2          | 626.9521    | -4.8      | 29.8   |              |                        | -                         | C10F18ClO2H  | 4           | 528.9293    | -2.2      | 26.8   |              |       |
| H-PFdiOAs            | D(8)                 | C11H3F17O4  | 4          | 520.9702    | 2.8       | 13.4   |              |                        | -                         | C11F20ClO2H  | 4           | 578.9251    | -3.7      | 28.1   |              |       |
|                      | D(9)                 | C12H3F19O4  | 3          | 570.9644    | -2.0      | 16.4   |              |                        | -                         | C12F22ClO2H  | 4           | 628.9242    | 0.2       | 29.5   |              |       |
|                      | D(10)                | C13H3F21O4  | 3          | 620.9616    | -1.1      | 18.8   |              |                        | -                         | C13F24ClO2H  | 4           | 678.9198    | -1.7      | 30.6   |              |       |

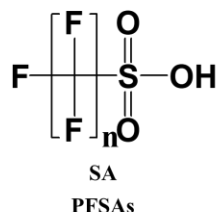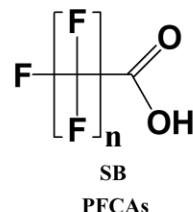

**Figure S2.** The identified PFASs with level 4 or above in APM. The letters in the “Proposed Structure” column refer to the generic structure represented by the same letters, and the numbers in parentheses in the “Proposed Structure” column indicate fluorinated chain length. The generic structure from A to I refer to the Figure 2 in manuscript.

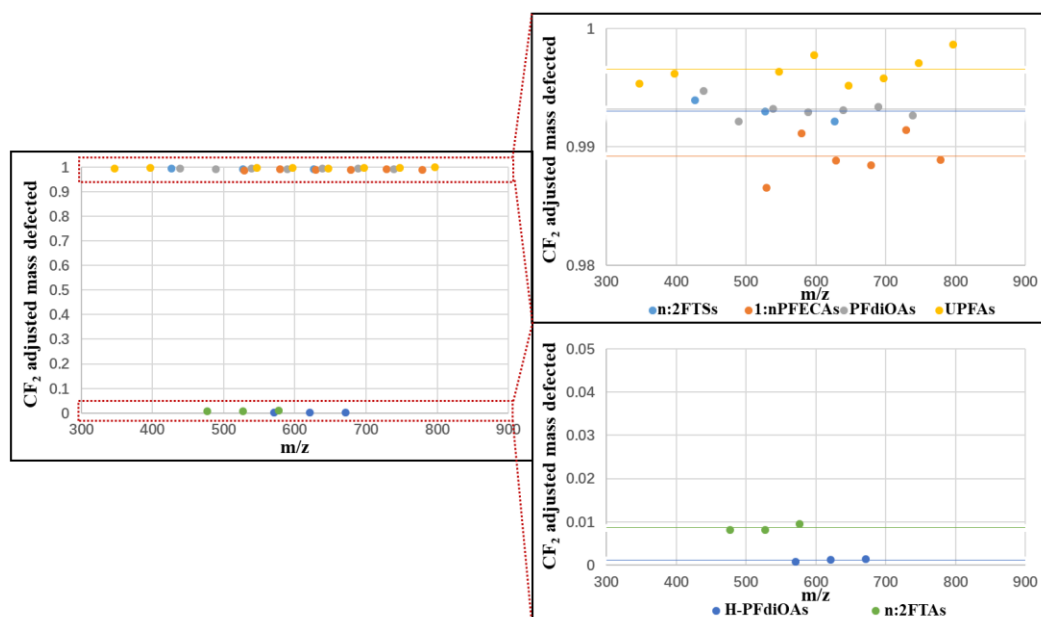

**Figure S3** CF<sub>2</sub> normalized adjusted Kendrick mass defect plot of identified PFASs (level 3 or above) by PFASs homologues analysis.

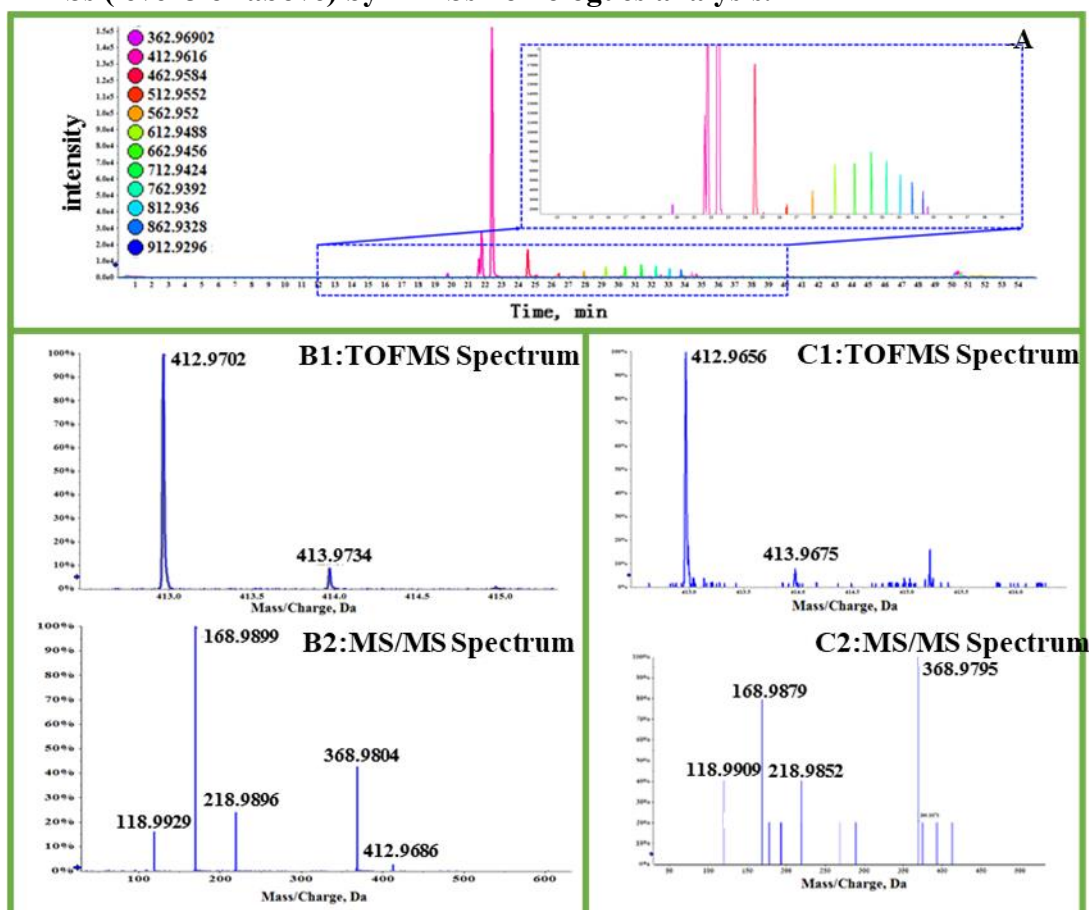

**Figure S4.** Identification of PFCAs using PFASs homologues analysis (A: EIC of identified PFCAs; B1: TOF-MS spectrum of PFOA in samples; B2: MS/MS spectrum of PFOA in samples; C1: TOF-MS spectrum of PFOA in standards; C2: MS/MS spectrum of PFOA in standards). By comparison with library spectra from AB sciex, the MS/MS match score was 99.3.

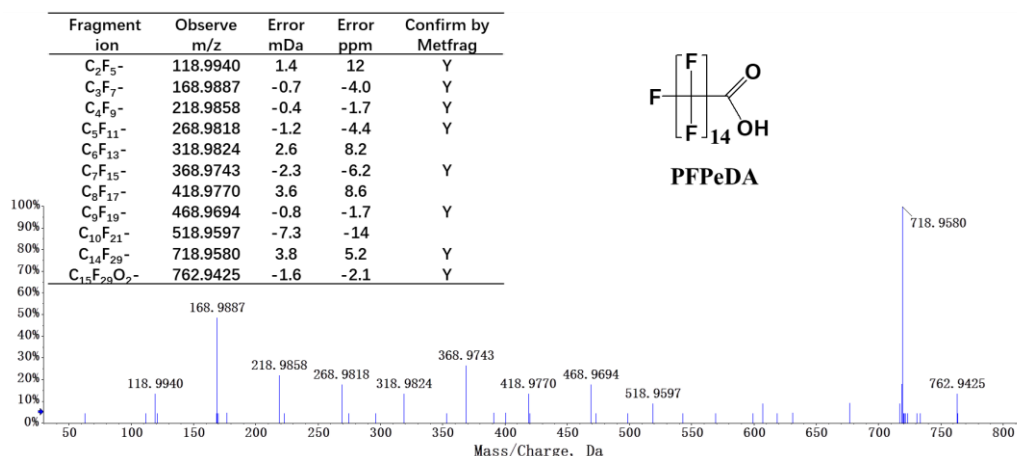

**Figure S5.** The MS/MS spectrum for PFPeDA. “Y” in the column of “Confirm by Metfrag” means that the fragment matches with the predicted fragment from Metfrag.

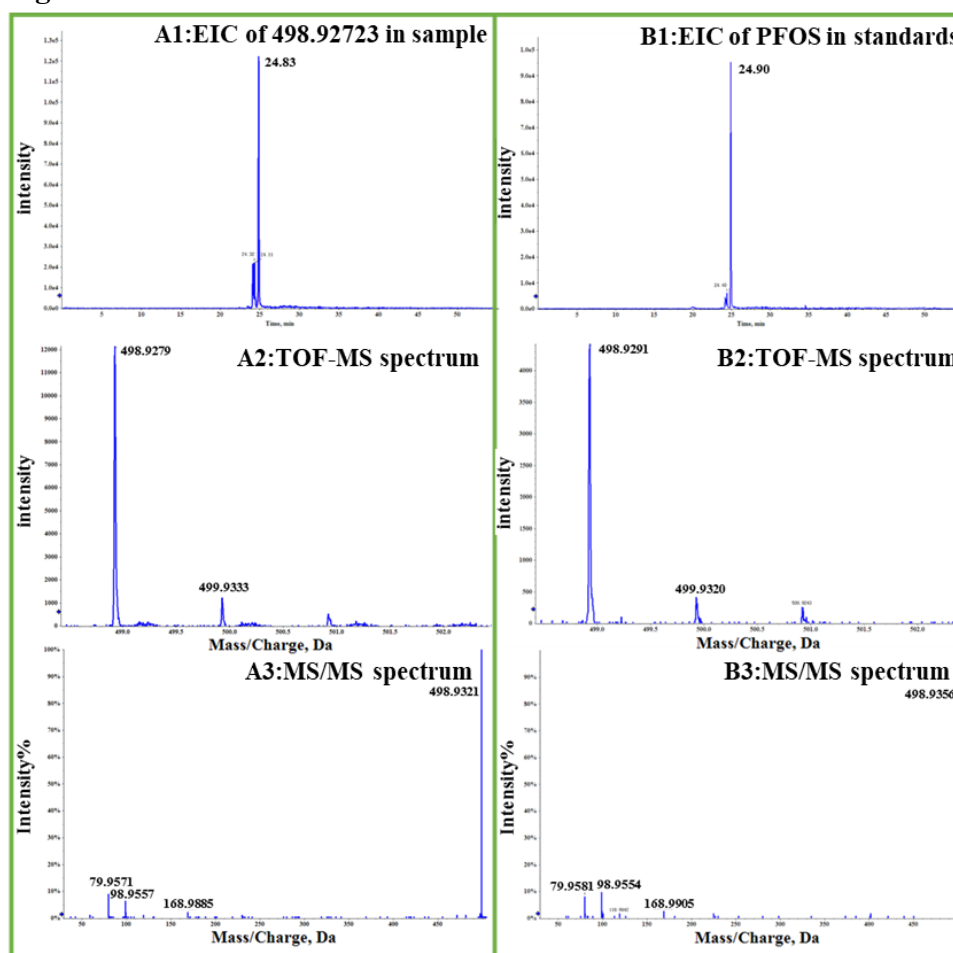

**Figure S6.** Identification of PFOS using PFASs homologues analysis (A1: EIC of 498.92723 in sample; A2: TOF-MS spectrum of 498.92723 in samples; A3: MS/MS spectrum of 498.92723 in samples; B1: EIC of PFOS; B2: TOF-MS spectrum of PFOS; B3: MS/MS spectrum of PFOS). By comparison with library spectra from AB sciex, the MS/MS match score was 96.3.







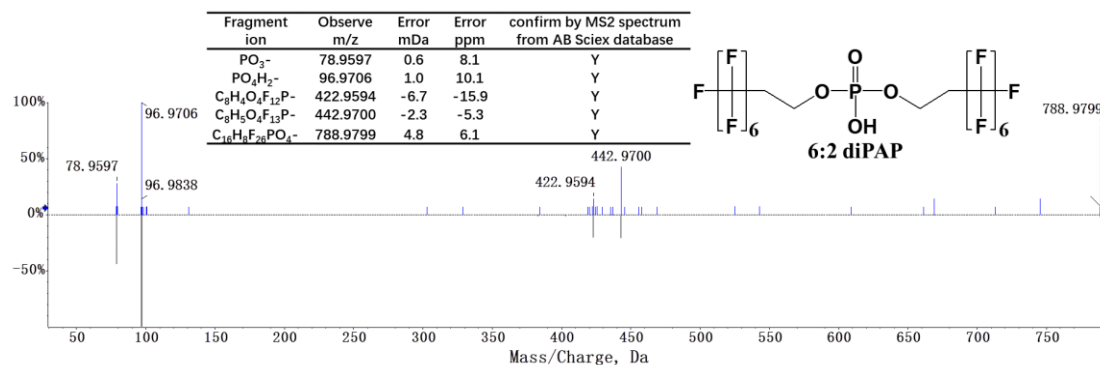

**Figure S13.** The MS/MS spectrum for 6:2 diPAP. “Y” in the column of “Confirm by MS2 spectrum from AB Sciex database” means that the fragment matches with the fragment in the MS2 spectrum from AB Sciex database, and the MS/MS match score was 83.8

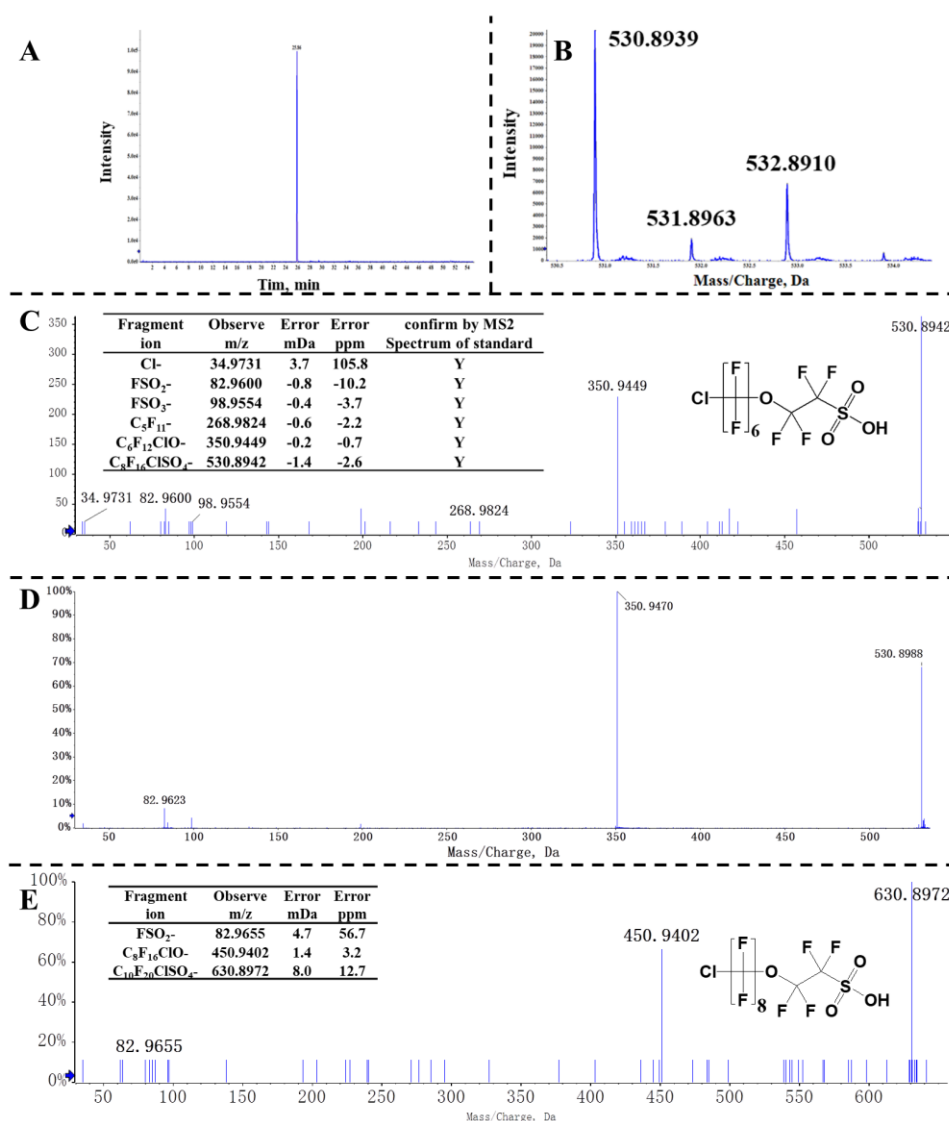

**Figure S14.** Identification of 6:2 Cl-PFESA. (A) EIC of 530.8988 in sample, (B) TOF-MS spectrum of 530.8988 in samples, (C) MS/MS spectrum of 530.8988 in samples, (D) MS/MS spectrum of 6:2 Cl-PFESA in standard, (E) MS/MS spectrum of 630.8880 in samples.

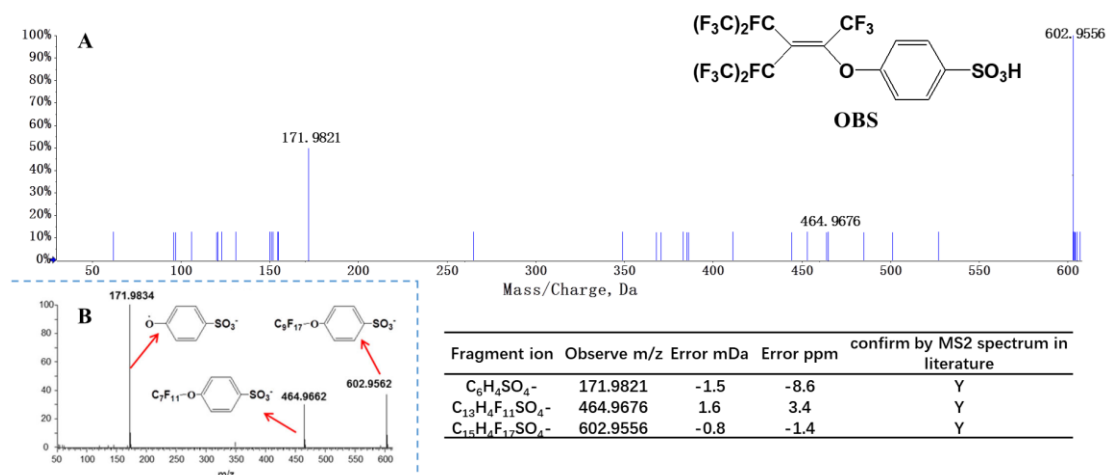

**Figure S15.** The MS/MS spectrum for OBS in sample (A) and literature<sup>4</sup> (B). “Y” in the column of “Confirm by MS2 spectrum in literature” means that the fragment matches with the fragment in the MS2 spectrum from literature.

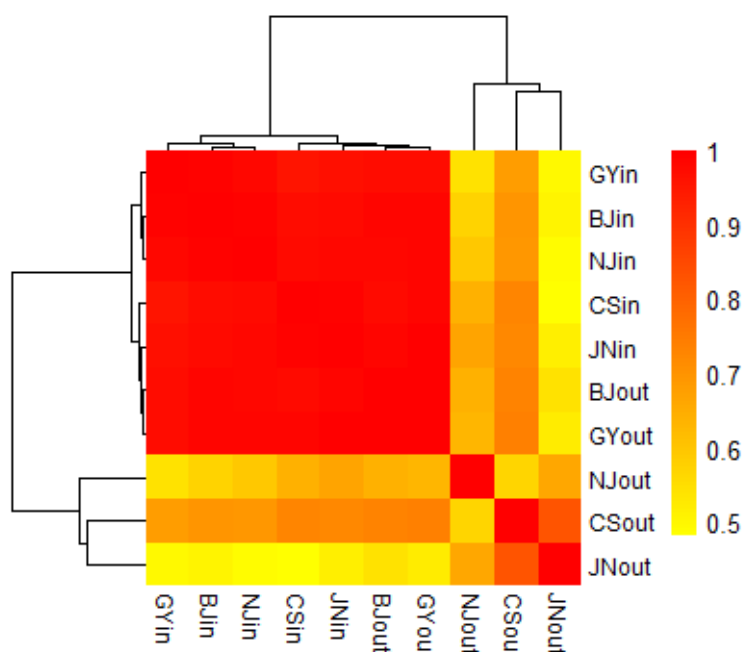

**Figure S16.** Correlation heatmap and hierarchical clustering of APM samples based on their Pearson correlation coefficients. “in” is for indoor, “out” is for outdoor. GY: Guiyang, BJ: Beijing, NJ: Nanjing, CS: Changshu, JN: Jinan.



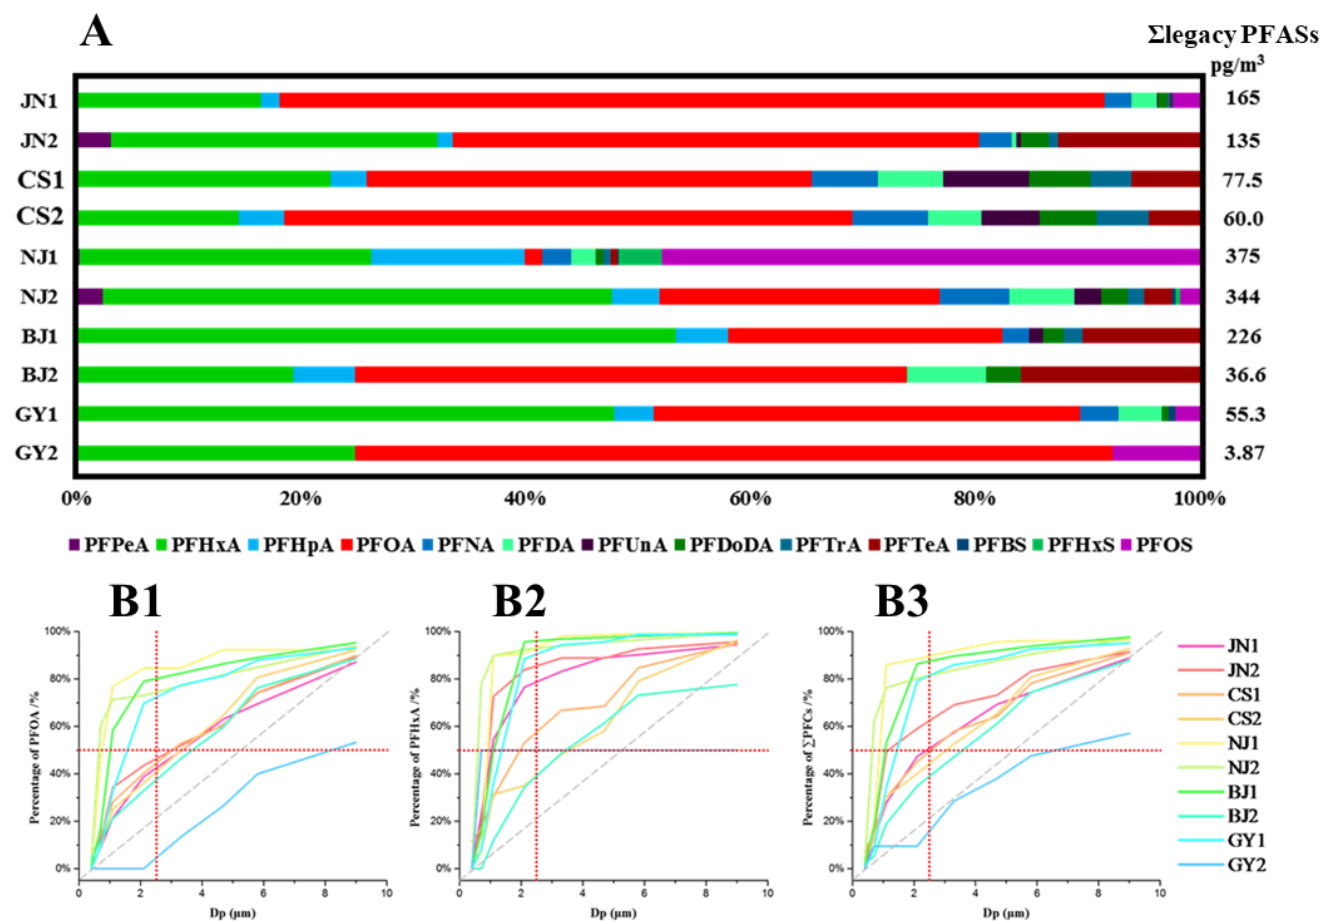

**Figure S17. The proportional distribution and size distribution of legacy PFASs in indoor APM. A: proportional distribution of legacy PFASs in indoor APM; B: Size distribution of PFOA(B1), PFHxA(B2) and legacy PFASs(B3) in indoor APM. GY: Guiyang, BJ: Beijing, NJ: Nanjing, CS: Changshu, JN: Jinan.**

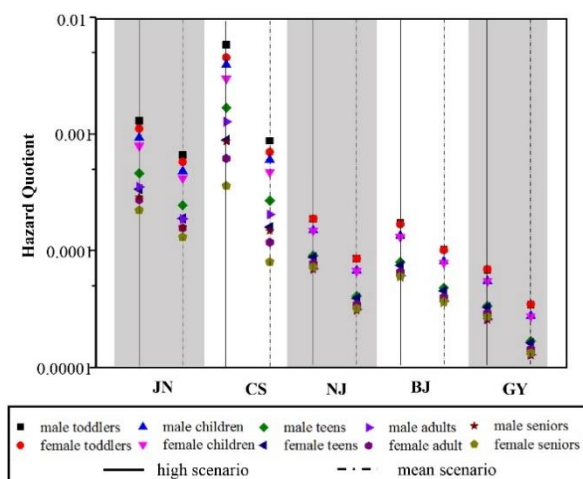

**Figure S18. Age- and sex-specific health risks posed by PFOA via inhalation in urban China. GY: Guiyang, BJ: Beijing, NJ: Nanjing, CS: Changshu, JN: Jinan.**

**Table S4: sample information including name, location, sampling date and condition**

| Sample Number | longitude     | latitude     | Sampling Data |            | Condition |
|---------------|---------------|--------------|---------------|------------|-----------|
| GY1           | E106 °42' 18" | N26 °34' 27" | 2014.6.30     | 2014.7.2   | a         |
| GY2           | E106 °43' 7"  | N26 °33' 50" | 2014.7.3      | 2014.7.5   | a         |
| BJ1           | E116 °18' 33" | N39 °58' 20" | 2015.5.9      | 2015.5.11  | a         |
| BJ2           | E116 °29' 11" | N39 °55' 31" | 2015.5.12     | 2015.5.14  | a         |
| JN1           | E117 °5' 15"  | N36 °40' 43" | 2014.11.20    | 2014.11.22 | a         |
| JNOUT2        | E117 °1' 29"  | N36 °40' 13" | 2014.11.22    | 2014.11.23 | b         |
| JNIN2         | E117 °1' 29"  | N36 °40' 13" | 2014.11.23    | 2014.11.25 | b         |
| NJOUT1        | E118 °57' 36" | N32 °7' 23"  | 2014.2.20     | 2014.2.21  | c#        |
| NJOUT2        | E118 °57' 36" | N32 °7' 23"  | 2014.2.21     | 2014.2.22  | c#        |
| NJOUT3        | E118 °57' 36" | N32 °7' 23"  | 2014.2.22     | 2014.2.23  | c#        |
| NJOUT4        | E118 °57' 36" | N32 °7' 23"  | 2014.3.09     | 2014.3.10  | c#        |
| NJOUT5        | E118 °57' 36" | N32 °7' 23"  | 2014.3.10     | 2014.3.11  | c#        |
| NJOUT6        | E118 °57' 36" | N32 °7' 23"  | 2014.4.29     | 2014.5.1   | c         |
| NJOUT7        | E118 °57' 36" | N32 °7' 23"  | 2014.5.14     | 2014.5.16  | c         |
| NJOUT8        | E118 °57' 36" | N32 °7' 23"  | 2014.5.19     | 2014.5.21  | c         |
| NJIN1         | E118 °57' 41" | N32 °7' 4"   | 2014.4.13     | 2014.4.15  | c         |
| NJIN2         | E118 °57' 41" | N32 °7' 4"   | 2014.4.16     | 2014.4.18  | c         |
| CSOUT1        | E120 °47' 29" | N31 °48' 22" | 2015.7.20     | 2015.7.22  | c         |
| CSOUT2        | E120 °47' 29" | N31 °48' 22" | 2015.7.22     | 2015.7.24  | c         |
| CSOUT3        | E120 °47' 29" | N31 °48' 22" | 2015.7.24     | 2015.7.26  | c         |
| CSOUT4        | E120 °47' 29" | N31 °48' 22" | 2015.7.26     | 2015.7.28  | c         |
| CSOUT5        | E120 °47' 29" | N31 °48' 22" | 2015.7.28     | 2015.7.30  | c         |
| CSOUT6        | E120 °52' 37" | N31 °42' 44" | 2015.7.20     | 2015.7.22  | a         |
| CSOUT7        | E120 °45' 35" | N31 °40' 29" | 2015.7.22     | 2015.7.24  | b         |
| CSOUT8        | E120 °45' 50" | N31 °40' 29" | 2015.7.24     | 2015.7.26  | c         |
| CSOUT9        | E120 °45' 12" | N31 °51' 32" | 2015.7.26     | 2015.7.28  | c         |
| CSOUT10       | E120 °33'     | N31 °53' 56" | 2015.7.28     | 2015.7.30  | c         |
| CSIN1         | E120 °52' 37" | N31 °42' 44" | 2015.7.20     | 2015.7.22  | a         |
| CSIN2         | E120 °45' 35" | N31 °40' 29" | 2015.7.23     | 2015.7.25  | b         |

a: the indoor APM samples and outdoor APM samples were collected at same time and in or out a same residence; b: the indoor APM samples and outdoor APM samples were collected in or out a same residence but not at same time; c: the indoor APM samples and outdoor APM samples were collected neither at same time nor in or out a same residence.

**Table S5: The sensitivity of HPLC-QTOF analysis with known PFASs standards at 0.1, 0.5, 1, and 0.5  $\mu\text{g L}^{-1}$ , respectively**

| Analyte  | Theoretical mass /Da | RT/min | 0.1 $\mu\text{g L}^{-1}$ |           | 0.5 $\mu\text{g L}^{-1}$ |            | 1 $\mu\text{g L}^{-1}$ |           | 5 $\mu\text{g L}^{-1}$ |            |
|----------|----------------------|--------|--------------------------|-----------|--------------------------|------------|------------------------|-----------|------------------------|------------|
|          |                      |        | Experimental mass/Da     | Error/ppm | Experimental mass/Da     | Error /ppm | Experimental mass/Da   | Error/ppm | Experimental mass/Da   | Error /ppm |
| PFPeA    | 262.976              | 9.32   | -                        | -         | -                        | -          | -                      | -         | 262.97551              | -1.9       |
| PFHxA    | 312.9728             | 15.76  | -                        | -         | -                        | -          | -                      | -         | 312.97372              | 2.91       |
| PFHpA    | 362.9696             | 19.79  | -                        | -         | -                        | -          | 362.96802              | -4.41     | 362.96933              | -0.83      |
| PFOA     | 412.9664             | 22.5   | -                        | -         | -                        | -          | -                      | -         | 412.96559              | -1.94      |
| PFNA     | 462.9632             | 24.62  | -                        | -         | -                        | -          | -                      | -         | 462.96231              | -1.94      |
| PFDA     | 512.96               | 26.37  | -                        | -         | -                        | -          | -                      | -         | 512.9597               | -0.58      |
| PFUnA    | 562.9569             | 27.89  | -                        | -         | 562.95498                | -3.32      | -                      | -         | 562.95654              | -0.53      |
| PFDoDA   | 612.9537             | 29.21  | -                        | -         | -                        | -          | -                      | -         | 612.95449              | 1.37       |
| PFTTrA   | 662.9505             | 30.35  | -                        | -         | 662.94762                | -4.28      | 662.94721              | -4.9      | 662.95044              | 0          |
| PFTeA    | 712.9473             | 31.35  | -                        | -         | -                        | -          | -                      | -         | 712.94619              | -1.54      |
| PFBS     | 298.943              | 13.01  | -                        | -         | -                        | -          | 298.94253              | -1.54     | 298.94253              | -1.67      |
| PFHxS    | 398.9366             | 20.6   | -                        | -         | -                        | -          | -                      | -         | 398.93568              | -2.26      |
| PFOS     | 498.9302             | 24.9   | 498.9284                 | -3.73     | -                        | -          | -                      | -         | 498.92948              | -1.4       |
| 6:2diPAP | 788.9751             | 31.31  | -                        | -         | 788.9734                 | -2.1       | 788.97272              | -2.97     | 788.97496              | -0.13      |
| 8:2diPAP | 988.9623             | 33.97  | -                        | -         | -                        | -          | -                      | -         | 988.96443              | 2.17       |

**Table S6: Parameters used in risk assessment**

| <b>Generation and Gender</b> | <b>Age / year</b> | <b>Body<br/>Weight / kg</b> | <b>Daily Indoor Inhalation<br/>Rate / L<sup>3</sup> day<sup>-1</sup></b> | <b>Daily Outdoor Inhalation<br/>Rate / L<sup>3</sup> day<sup>-1</sup></b> |
|------------------------------|-------------------|-----------------------------|--------------------------------------------------------------------------|---------------------------------------------------------------------------|
| male toddlers                | 0.5-4             | 15.7                        | 6249                                                                     | 3587                                                                      |
| female toddlers              |                   | 15.3                        | 6234                                                                     | 2696                                                                      |
| male children                | 5-11              | 32.2                        | 10337                                                                    | 4931                                                                      |
| female children              |                   | 32.0                        | 10448                                                                    | 3701                                                                      |
| male teens                   | 12-19             | 67.5                        | 13499                                                                    | 4375                                                                      |
| female teens                 |                   | 60.6                        | 12026                                                                    | 2018                                                                      |
| male adults                  | 20-59             | 86.8                        | 13360                                                                    | 4272                                                                      |
| female adult                 |                   | 74.7                        | 13236                                                                    | 1698                                                                      |
| male seniors                 | >60               | 84.1                        | 12973                                                                    | 2766                                                                      |
| female seniors               |                   | 72.0                        | 11932                                                                    | 904                                                                       |

**Table S7: The CAS number, IUPAC name and SMILE for the identified PFASs with level 1 and level 2.**

| homologue | Formula   | level | CAS        | IUPAC name                                                                                               | SMILE                                                                                                |
|-----------|-----------|-------|------------|----------------------------------------------------------------------------------------------------------|------------------------------------------------------------------------------------------------------|
| PFASs     | C4F9SO3H  | 1     | 375-73-5   | 1,1,2,2,3,3,4,4,4-Nonafluoro-1-butanesulfonic acid                                                       | <chem>C(C(C(F)(F)S(=O)(=O)O)(F)F)(C(F)(F)F)F</chem>                                                  |
|           | C6F13SO3H | 1     | 355-46-4   | 1,1,2,2,3,3,4,4,5,5,6,6,6-tridecafluorohexane-1-sulfonic acid                                            | <chem>C(C(C(C(F)(F)S(=O)(=O)O)(F)F)(F)F)(C(C(F)(F)F)(F)F)F</chem>                                    |
|           | C8F17SO3H | 1     | 1763-23-1  | 1,1,2,2,3,3,4,4,5,5,6,6,7,7,8,8,8-hepta-decafluorooctane-1-sulfonic acid                                 | <chem>C(C(C(C(C(F)(F)S(=O)(=O)O)(F)F)(F)F)(F)F)(C(C(C(F)(F)F)(F)F)F)F</chem>                         |
| PFCAs     | C6F11O2H  | 1     | 307-24-4   | 2,2,3,3,4,4,5,5,6,6,6-undecafluorohexanoic acid                                                          | <chem>C(=O)(C(C(C(C(C(F)(F)F)(F)F)(F)F)(F)F)(F)F)O</chem>                                            |
|           | C7F13O2H  | 1     | 375-85-9   | 2,2,3,3,4,4,5,5,6,6,7,7,7-tridecafluoroheptanoic acid                                                    | <chem>C(=O)(C(C(C(C(C(C(F)(F)F)(F)F)(F)F)(F)F)(F)F)(F)F)O</chem>                                     |
|           | C8F15O2H  | 1     | 335-67-1   | 2,2,3,3,4,4,5,5,6,6,7,7,8,8,8-pentadecafluorooctanoic acid                                               | <chem>C(=O)(C(C(C(C(C(C(C(F)(F)F)(F)F)(F)F)(F)F)(F)F)(F)F)(F)F)O</chem>                              |
|           | C9F17O2H  | 1     | 375-95-1   | 2,2,3,3,4,4,5,5,6,6,7,7,8,8,9,9,9-hepta-decafluorononanoic acid                                          | <chem>C(=O)(C(C(C(C(C(C(C(C(F)(F)F)(F)F)(F)F)(F)F)(F)F)(F)F)(F)F)O</chem>                            |
|           | C10F19O2H | 1     | 335-76-2   | 2,2,3,3,4,4,5,5,6,6,7,7,8,8,9,9,10,10,10-nonadecafluorodecanoic acid                                     | <chem>C(=O)(C(C(C(C(C(C(C(C(C(F)(F)F)(F)F)(F)F)(F)F)(F)F)(F)F)(F)F)(F)F)O</chem>                     |
|           | C11F21O2H | 1     | 2058-94-8  | 2,2,3,3,4,4,5,5,6,6,7,7,8,8,9,9,10,10,11,11,11-henicosaflluoroundecanoic acid                            | <chem>C(=O)(C(C(C(C(C(C(C(C(C(C(F)(F)F)(F)F)(F)F)(F)F)(F)F)(F)F)(F)F)(F)F)(F)F)O</chem>              |
|           | C12F23O2H | 1     | 307-55-1   | 2,2,3,3,4,4,5,5,6,6,7,7,8,8,9,9,10,10,11,11,12,12,12-tricosaflluorododecanoic acid                       | <chem>C(=O)(C(C(C(C(C(C(C(C(C(C(C(F)(F)F)(F)F)(F)F)(F)F)(F)F)(F)F)(F)F)(F)F)(F)F)O</chem>            |
|           | C13F25O2H | 1     | 72629-94-8 | 2,2,3,3,4,4,5,5,6,6,7,7,8,8,9,9,10,10,11,11,12,12,13,13,13-pentacosaflluorotridecanoic acid              | <chem>C(=O)(C(C(C(C(C(C(C(C(C(C(C(C(F)(F)F)(F)F)(F)F)(F)F)(F)F)(F)F)(F)F)(F)F)(F)F)O</chem>          |
|           | C14F27O2H | 1     | 376-06-7   | 2,2,3,3,4,4,5,5,6,6,7,7,8,8,9,9,10,10,11,11,12,12,13,13,14,14,14-heptacosaflluorotetradecanoic acid      | <chem>C(=O)(C(C(C(C(C(C(C(C(C(C(C(C(C(F)(F)F)(F)F)(F)F)(F)F)(F)F)(F)F)(F)F)(F)F)(F)F)O</chem>        |
|           | C15F29O2H | 2     |            | 2,2,3,3,4,4,5,5,6,6,7,7,8,8,9,9,10,10,11,11,12,12,13,13,14,14,15,15,15-nonacosaflluoropentadecanoic acid | <chem>C(=O)(C(C(C(C(C(C(C(C(C(C(C(C(C(C(F)(F)F)(F)F)(F)F)(F)F)(F)F)(F)F)(F)F)(F)F)(F)F)(F)F)O</chem> |



| homologue     | Formula      | level | CAS         | IUPAC name                                                                                                 | SMILE                                                                                                    |
|---------------|--------------|-------|-------------|------------------------------------------------------------------------------------------------------------|----------------------------------------------------------------------------------------------------------|
| n:2 FTSs      | C8F13SO3H5   | 1     | 27619-97-2  | 3,3,4,4,5,5,6,6,7,7,8,8,8-Tridecafluorooctane-1-sulfonic acid                                              | OS(=O)(=O)CCC(F)(F)C(F)(F)C(F)(F)C(F)(F)C(F)(F)C(F)(F)F                                                  |
|               | C10F17SO3H5  | 1     | 39108-34-4  | 3,3,4,4,5,5,6,6,7,7,8,8,9,9,10,10,10-Heptadecafluorodecane-1-sulfonic acid                                 | OS(=O)(=O)CCC(F)(F)C(F)(F)C(F)(F)C(F)(F)C(F)(F)C(F)(F)C(F)(F)C(F)(F)C(F)(F)F                             |
|               | C12F21SO3H5  | 2     | 120226-60-0 | 3,3,4,4,5,5,6,6,7,7,8,8,9,9,10,10,11,11,12,12,12-Henicosafuoro-1-dodecanesulfonic acid                     | C(CS(=O)(=O)O)C(C(C(C(C(C(C(C(C(C(F)(F)F)(F)F)(F)F)(F)F)(F)F)(F)F)(F)F)(F)F)(F)F)(F)F                    |
| PFdiOAs       | C9F14O4H2    | 2     |             | 2,2,3,3,4,4,5,5,6,6,7,7,8,8-tetradecafluorononanedioic acid                                                | C(C(C(C(C(C(C(C(C(=O)O)(F)F)(F)F)(F)F)(F)F)(F)F)(F)F)(F)F)(=O)O                                          |
|               | C10F16O4H2   | 1     | 307-78-8    | 2,2,3,3,4,4,5,5,6,6,7,7,8,8,9,9-hexadecafluorodecanedioic acid                                             | C(=O)(C(C(C(C(C(C(C(C(C(=O)O)(F)F)(F)F)(F)F)(F)F)(F)F)(F)F)(F)F)(F)F)O                                   |
|               | C11F18O4H2   | 2     |             | 2,2,3,3,4,4,5,5,6,6,7,7,8,8,9,9,10,10-octadecafluoroundecanedioic acid                                     | C(C(C(C(C(C(C(C(C(C(C(C(C(=O)O)(F)F)(F)F)(F)F)(F)F)(F)F)(F)F)(F)F)(F)F)(F)F)(=O)O                        |
|               | C12F20O4H2   | 1     | 865-85-0    | 2,2,3,3,4,4,5,5,6,6,7,7,8,8,9,9,10,10,11,11-icosafuorododecanedioic acid                                   | C(=O)(C(C(C(C(C(C(C(C(C(C(C(C(C(C(=O)O)(F)F)(F)F)(F)F)(F)F)(F)F)(F)F)(F)F)(F)F)(F)F)O                    |
|               | C13F22O4H2   | 2     |             | 2,2,3,3,4,4,5,5,6,6,7,7,8,8,9,9,10,10,11,11,12,12-docosafluorotridecanedioic acid                          | C(C(C(C(C(C(C(C(C(C(C(C(C(C(C(=O)O)(F)F)(F)F)(F)F)(F)F)(F)F)(F)F)(F)F)(F)F)(F)F)(O)=O                    |
|               | C14F24O4H2   | 2     |             | 2,2,3,3,4,4,5,5,6,6,7,7,8,8,9,9,10,10,11,11,12,12,13,13-tetracosafuorotetradecanedioic acid                | C(C(C(C(C(C(C(C(C(C(C(C(C(C(C(C(C(C(=O)O)(F)F)(F)F)(F)F)(F)F)(F)F)(F)F)(F)F)(F)F)(F)F)(=O)O              |
|               | C15F26O4H2   | 2     |             | 2,2,3,3,4,4,5,5,6,6,7,7,8,8,9,9,10,10,11,11,12,12,13,13,14,14-hexacosafuoropentadecanedioic acid           | C(C(C(C(C(C(C(C(C(C(C(C(C(C(C(C(C(C(C(C(=O)O)(F)F)(F)F)(F)F)(F)F)(F)F)(F)F)(F)F)(F)F)(F)F)(=O)O          |
| 6:2 diPAP     | C16H9F26O4P  | 1     | 57677-95-9  | bis(3,3,4,4,5,5,6,6,7,7,8,8,8-tridecafluorooctyl) hydrogen phosphate                                       | C(COP(=O)(O)OCCC(C(C(C(C(C(C(F)(F)F)(F)F)(F)F)(F)F)(F)F)(F)F)C(C(C(C(C(C(F)(F)F)(F)F)(F)F)(F)F)(F)F)(F)F |
| n:2 Cl-PFESAs | C8HCIF16O4S  | 1     | 756426-58-1 | 2-(6-chloro-1,1,2,2,3,3,4,4,5,5,6,6-dodecafluoro-hexoxy)-1,1,2,2-tetrafluoro-ethanesulfonic acid           | C(C(C(C(F)(F)Cl)(F)F)(F)F)(C(C(OC(C(F)(F)S(=O)(=O)O)(F)F)(F)F)(F)F)(F)F                                  |
|               | C10HCIF20O4S | 2     |             | 2-(8-chloro-1,1,2,2,3,3,4,4,5,5,6,6,7,7,8,8-hexadecafluoro-octoxy)-1,1,2,2-tetrafluoro-ethanesulfonic acid | C(C(C(C(C(F)(F)Cl)(F)F)(F)F)(F)F)(C(C(C(OC(C(F)(F)S(=O)(=O)O)(F)F)(F)F)(F)F)(F)F)(F)F                    |



| homologue | Formula     | level | CAS         | IUPAC name                                                                                                                            | SMILE                                                                                               |
|-----------|-------------|-------|-------------|---------------------------------------------------------------------------------------------------------------------------------------|-----------------------------------------------------------------------------------------------------|
| OBS       | C15H5F17SO4 | 2     | 271794-15-1 | 4-{[1,1,1,4,5,5,5-heptafluoro-3-(1,1,1,2,3,3,3-heptafluoropropan-2-yl)-4-(trifluoromethyl)pent-2-en-2-yl]oxy} benzene-1-sulfonic acid | <chem>C(=C(C(F)(F)F)OC1=CC=C(C(=C1)[S](=O)(=O)O)(C(C(F)(F)F)(C(F)(F)F)C(C(F)(F)F)(C(F)(F)F)F</chem> |

**Table S8: The detection in APM for the identified PFASs with level 4 and level 5.**

| Homologue  | Formula     | level | Observe<br>m/z | RT<br>min | Detection in APM |                | Homologue | Formula | level | Observe<br>m/z | RT<br>min | Detection in APM |          |
|------------|-------------|-------|----------------|-----------|------------------|----------------|-----------|---------|-------|----------------|-----------|------------------|----------|
|            |             |       |                |           | Indoor           | Outdoor        |           |         |       |                |           | Indoor           | Outdoor  |
| PFSAs      | C7F15SO3H   | 4     | 448.9331       | 22.9      | BJ;CS;GY;NJ      | BJ;CS;GY;NJ    | Class 8   |         | 5     | 298.0815       | 7.5       |                  | NJ       |
| 1:n PFECAs | C16F31O3H   | 4     | 828.9354       | 33.1      |                  | CS             |           |         | 5     | 348.0779       | 11.6      |                  | NJ       |
|            | C17F33O3H   | 4     | 878.9318       | 33.8      |                  | CS             |           |         | 5     | 398.0746       | 12.4      |                  | JN;NJ    |
| H-PFdiOAs  | C11H3F17O4  | 4     | 520.9702       | 13.4      |                  | JN             | Class 9   |         | 5     | 299.1131       | 13.4      |                  | NJ       |
|            | C15H3F25O4  | 4     | 720.9546       | 22.5      | CS;GY            | CS;GY          |           |         | 5     | 349.1084       | 20.5      |                  | NJ       |
| PFdiOAs    | C16F28O4H2  | 4     | 788.9451       | 24.9      | GY;JN            | CS             |           |         | 5     | 399.1057       | 24.5      |                  | JN;NJ    |
|            | C17F30O4H2  | 4     | 838.9427       | 26.2      |                  | GY             | Class 10  |         | 5     | 301.0944       | 8.6       | GY               |          |
| UPFAs      | C9F17OH     | 4     | 446.9663       | 26.4      |                  | CS             |           |         | 5     | 351.0919       | 12.0      |                  | JN       |
|            | C10F19OH    | 4     | 496.9664       | 27.8      |                  | CS;GY          |           |         | 5     | 401.0896       | 14.5      |                  | JN;NJ    |
| UPFCAs*    | C9F15O2H    | 4     | 424.9645       | 21.7      | BJ;GY;NJ         | BJ;CS;GY       | Class 11  |         | 5     | 301.1259       | 10.5      |                  | NJ       |
|            | C10F17O2H   | 4     | 474.9622       | 23.9      | BJ;CS;GY;JN;NJ   | BJ;CS;GY;NJ    |           |         | 5     | 351.1227       | 19.9      |                  | JN       |
|            | C11F19O2H   | 4     | 524.9584       | 25.7      | BJ;GY;JN;NJ      | BJ;CS;GY;NJ    |           |         | 5     | 401.1206       | 27.5      |                  | JN       |
| Cl-PFCAs*  | C8F14ClO2H  | 4     | 428.9355       | 22.7      |                  | CS             | Class 12  |         | 5     | 302.0694       | 9.9       |                  | NJ       |
|            | C9F16ClO2H  | 4     | 478.9345       | 24.9      |                  | CS             |           |         | 5     | 352.0682       | 11.0      |                  | CS;JN;NJ |
|            | C10F18ClO2H | 4     | 528.9293       | 26.8      |                  | CS             |           |         | 5     | 402.0643       | 12.5      |                  | NJ       |
|            | C11F20ClO2H | 4     | 578.9251       | 28.1      | JN               | CS             | Class 13  |         | 5     | 309.1141       | 11.1      |                  | JN       |
|            | C12F22ClO2H | 4     | 628.9242       | 29.5      |                  | CS             |           |         | 5     | 359.1118       | 17.1      |                  | JN       |
|            | C13F24ClO2H | 4     | 678.9198       | 30.6      | CS               | CS             |           |         | 5     | 409.1081       | 21.3      |                  | JN       |
| Class 1    |             | 5     | 169.0868       | 8.5       | BJ               | BJ;CS;GY;JN;NJ | Class 14  |         | 5     | 317.0860       | 4.8       |                  | NJ       |
|            |             | 5     | 269.0819       | 13.8      |                  | JN             |           |         | 5     | 367.0812       | 11.5      |                  | JN       |
|            |             | 5     | 369.0746       | 15.0      |                  | NJ             |           |         | 5     | 417.0799       | 15.7      |                  | JN       |

| Homologue | Formula | level | Observe<br>m/z | RT<br>min | Detection in APM |          | Homologue | Formula | level | Observe<br>m/z | RT<br>min | Detection in APM |         |
|-----------|---------|-------|----------------|-----------|------------------|----------|-----------|---------|-------|----------------|-----------|------------------|---------|
|           |         |       |                |           | Indoor           | Outdoor  |           |         |       |                |           | Indoor           | Outdoor |
| Class 2   |         | 5     | 197.0826       | 7.9       |                  | NJ       | Class 15  |         | 5     | 325.0959       | 6.5       |                  | CS;GY   |
|           |         | 5     | 247.0793       | 11.8      |                  | NJ       |           |         | 5     | 375.0929       | 11.6      |                  | JN;NJ   |
|           |         | 5     | 297.0755       | 12.4      |                  | CS;JN;NJ |           |         | 5     | 425.0876       | 17.0      |                  | NJ      |
| Class 3   |         | 5     | 229.1092       | 7.7       |                  | NJ       | Class 16  |         | 5     | 327.0724       | 6.0       |                  | JN;NJ   |
|           |         | 5     | 279.1069       | 14.7      |                  | NJ       |           |         | 5     | 377.0687       | 10.9      |                  | BJ      |
|           |         | 5     | 329.1043       | 18.1      |                  | JN       |           |         | 5     | 427.0663       | 12.6      |                  | JN;NJ   |
| Class 4   |         | 5     | 260.0594       | 5.0       |                  | CS       | Class 17  |         | 5     | 331.0859       | 6.0       |                  | NJ      |
|           |         | 5     | 310.0575       | 7.0       |                  | JN       |           |         | 5     | 381.0826       | 8.5       |                  | JN      |
|           |         | 5     | 360.0530       | 7.7       |                  | JN;NJ    |           |         | 5     | 431.0792       | 9.8       |                  | NJ      |
| Class 5   |         | 5     | 275.0560       | 8.2       |                  | JN;NJ    | Class 18  |         | 5     | 355.1036       | 7.7       |                  | JN      |
|           |         | 5     | 325.0534       | 10.1      |                  | NJ       |           |         | 5     | 405.1016       | 13.8      |                  | JN      |
|           |         | 5     | 375.0481       | 11.9      |                  | GY       |           |         | 5     | 455.0987       | 21.6      |                  | CS      |
| Class 6   |         | 5     | 280.1031       | 10.9      |                  | BJ       | Class 19  |         | 5     | 385.1124       | 7.3       |                  | JN      |
|           |         | 5     | 330.1008       | 13.0      |                  | JN;NJ    |           |         | 5     | 435.1100       | 13.1      |                  | JN      |
|           |         | 5     | 380.0958       | 14.3      |                  | CS;GY;JN |           |         | 5     | 485.1067       | 20.4      |                  | NJ      |
| Class 7   |         | 5     | 283.1017       | 16.5      |                  | JN       |           |         |       |                |           |                  |         |
|           |         | 5     | 333.0971       | 17.1      |                  | CS;JN;NJ |           |         |       |                |           |                  |         |
|           |         | 5     | 383.0947       | 17.6      |                  | JN;NJ    |           |         |       |                |           |                  |         |

**Table S9: Levels of PFCAs, PFSA's and 6:2diPAP (pg m<sup>-3</sup>) measured in outdoor air particle in five cities in China.**

|          | JN (n=2) |         | CS (n=10) |         | NJ (n=8) |         | BJ (n=2) |         | GY (n=2) |         |
|----------|----------|---------|-----------|---------|----------|---------|----------|---------|----------|---------|
|          | mean     | maximum | mean      | maximum | mean     | maximum | mean     | maximum | mean     | maximum |
| PFPeA    | 12.9     | 23.0    | 6.85      | 26.4    | 0.85     | 2.70    | 0.51     | 0.53    | ND       | ND      |
| PFHxA    | 31.5     | 57.5    | 23.2      | 48.3    | 1.10     | 2.64    | 1.34     | 1.58    | 1.31     | 1.75    |
| PFHpA    | 9.25     | 11.2    | 11.7      | 50.0    | 0.51     | 0.79    | 0.99     | 1.40    | 0.24     | 0.38    |
| PFOA     | 325      | 544     | 556       | 3515    | 11.6     | 24.8    | 12.5     | 18.8    | 2.07     | 2.51    |
| PFNA     | 2.78     | 4.20    | 12.8      | 101     | 0.65     | 1.03    | 0.17     | 0.17    | 0.58     | 0.60    |
| PFDA     | 4.82     | 7.65    | 15.6      | 129     | 0.72     | 0.98    | 0.32     | 0.33    | 0.42     | 0.45    |
| PFUnA    | 1.66     | 2.73    | 19.3      | 161     | 0.70     | 1.04    | 0.42     | 0.62    | 0.50     | 0.58    |
| PFDoDA   | 4.79     | 8.87    | 19.4      | 160     | 0.50     | 0.57    | 0.56     | 0.70    | 0.15     | 0.20    |
| PFTTrA   | 2.19     | 3.72    | 19.8      | 161     | 0.56     | 0.94    | 0.41     | 0.59    | 0.19     | 0.20    |
| PFTeA    | 13.7     | 26.9    | 18.8      | 153     | 0.53     | 0.99    | 2.48     | 3.63    | ND       | ND      |
| PFBS     | 0.49     | 0.97    | 0.96      | 2.49    | 0.73     | 3.42    | ND       | ND      | 0.04     | 0.09    |
| PFHxS    | 0.11     | 0.22    | 1.83      | 3.63    | 2.01     | 4.39    | ND       | ND      | ND       | ND      |
| PFOS     | 6.28     | 6.43    | 8.37      | 15.6    | 4.30     | 10.6    | 0.80     | 1.24    | 0.14     | 0.19    |
| 6:2diPAP | 0.15     | 0.29    | 3.37      | 6.00    | 1.82     | 3.31    | 0.60     | 0.85    | ND       | ND      |

**Table S10: The identified PFASs in ESI positive mode.**

| Homologue | level | Observe<br>m/z | RT<br>min | Detection in APM |                |
|-----------|-------|----------------|-----------|------------------|----------------|
|           |       |                |           | Indoor           | Outdoor        |
| Class 1+  | 5     | 235.0596       | 1.9       |                  | NJ             |
|           | 5     | 285.0571       | 6.9       |                  | NJ             |
|           | 5     | 335.0520       | 14.3      | NJ               | BJ;CS;GY;JN;NJ |
| Class 2+  | 5     | 197.1168       | 17.0      |                  | BJ;GY;JN;NJ    |
|           | 5     | 247.1141       | 21.9      |                  | CS;GY;JN       |
|           | 5     | 297.1088       | 22.2      |                  | CS;GY;JN;NJ    |
| Class 3+  | 5     | 252.1236       | 14.5      | JN               |                |
|           | 5     | 302.1208       | 17.5      | BJ               | BJ;CS;GY       |
|           | 5     | 352.1166       | 20.4      | NJ               | CS;GY          |
| Class 4+  | 5     | 233.1140       | 16.5      | BJ;CS;GY;JN;NJ   |                |
|           | 5     | 333.1082       | 22.0      | BJ;CS;GY         | BJ;CS;GY;NJ    |
|           | 5     | 433.1022       | 25.1      | BJ;CS            | CS             |
| Class 5+  | 5     | 161.1315       | 16.6      | BJ;CS;GY;JN      |                |
|           | 5     | 211.1293       | 17.7      | JN               | GY             |
|           | 5     | 261.1258       | 25.6      | BJ;GY;JN;NJ      | BJ             |

## Reference

1. Ericson Jogsten, I.; Nadal, M.; van Bavel, B.; Lindstrom, G.; Domingo, J. L., Per- and polyfluorinated compounds (PFCs) in house dust and indoor air in Catalonia, Spain: implications for human exposure. *Environ. Int.* **2012**, *39*, (1), 172-80.
2. Fakouri Baygi, S.; Crimmins, B. S.; Hopke, P. K.; Holsen, T. M., Comprehensive Emerging Chemical Discovery: Novel Polyfluorinated Compounds in Lake Michigan Trout. *Environ. Sci. Technol.* **2016**, *50*, (17), 9460-9468.
3. Barzen-Hanson, K. A.; Roberts, S. C.; Choyke, S. J.; Oetjen, K.; McAlees, A.; Riddell, N.; McCrindle, R.; Ferguson, P. L.; Higgins, C. P.; Field, J. A., Discovery of 40 classes of per-and polyfluoroalkyl substances in historical aqueous film-forming foams (AFFFs) and AFFF-impacted groundwater. *Environ. Sci. Technol.* 2017, *51*(4): 2047-2057.
4. Xu, L.; Shi, Y.; Li, C.; Song, X.; Qin, Z.; Cao, D.; Cai, Y. Discovery of a Novel Polyfluoroalkyl Benzenesulfonic Acid around Oilfields in Northern China. *Environ. Sci. Technol.* 2017, *51* (24), 14173–14181.
